# Supplementary material for: Vitamin C induces specific demethylation of H3K9me2 in mouse embryonic stem cells via Kdm3a/b
Source: PubMed Central journal article supplement (PMC5506665; doi:10.1186/s13072-017-0143-3), 2017-07-12
Supplement: 13072_2017_143_MOESM1_ESM.pdf [file 13072_2017_143_MOESM1_ESM.pdf]

# Figure S1

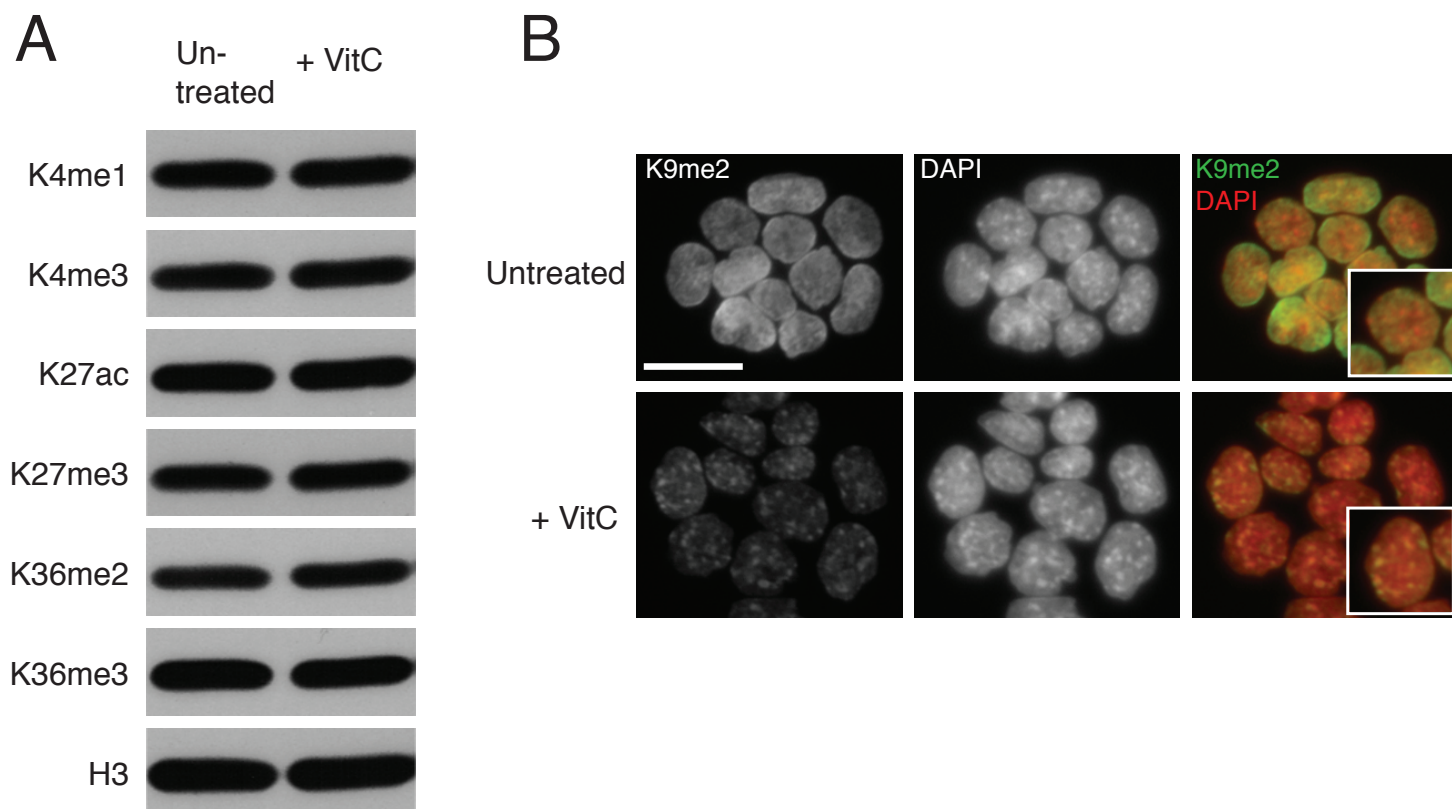

**Figure S1. Evaluation of changes in H3 PTMs following vitamin C treatment.**

A) Western blot for several H3 PTMs in ES cells +/- vitamin C. B) Immunofluorescence for H3K9me2 and corresponding DAPI staining in untreated and vitamin C-treated ES cells. Merged images show H3K9me2 in green and DAPI staining in red. H3K9me2 immunofluorescence also shown in Fig 1E. Scale bar represents 20 $\mu$ m.
