# Supplementary material for: Vitamin C induces specific demethylation of H3K9me2 in mouse embryonic stem cells via Kdm3a/b
Source: PubMed Central journal article supplement (PMC5506665; doi:10.1186/s13072-017-0143-3), 2017-07-12
Supplement: 13072_2017_143_MOESM2_ESM.pdf [file 13072_2017_143_MOESM2_ESM.pdf]

# Figure S2

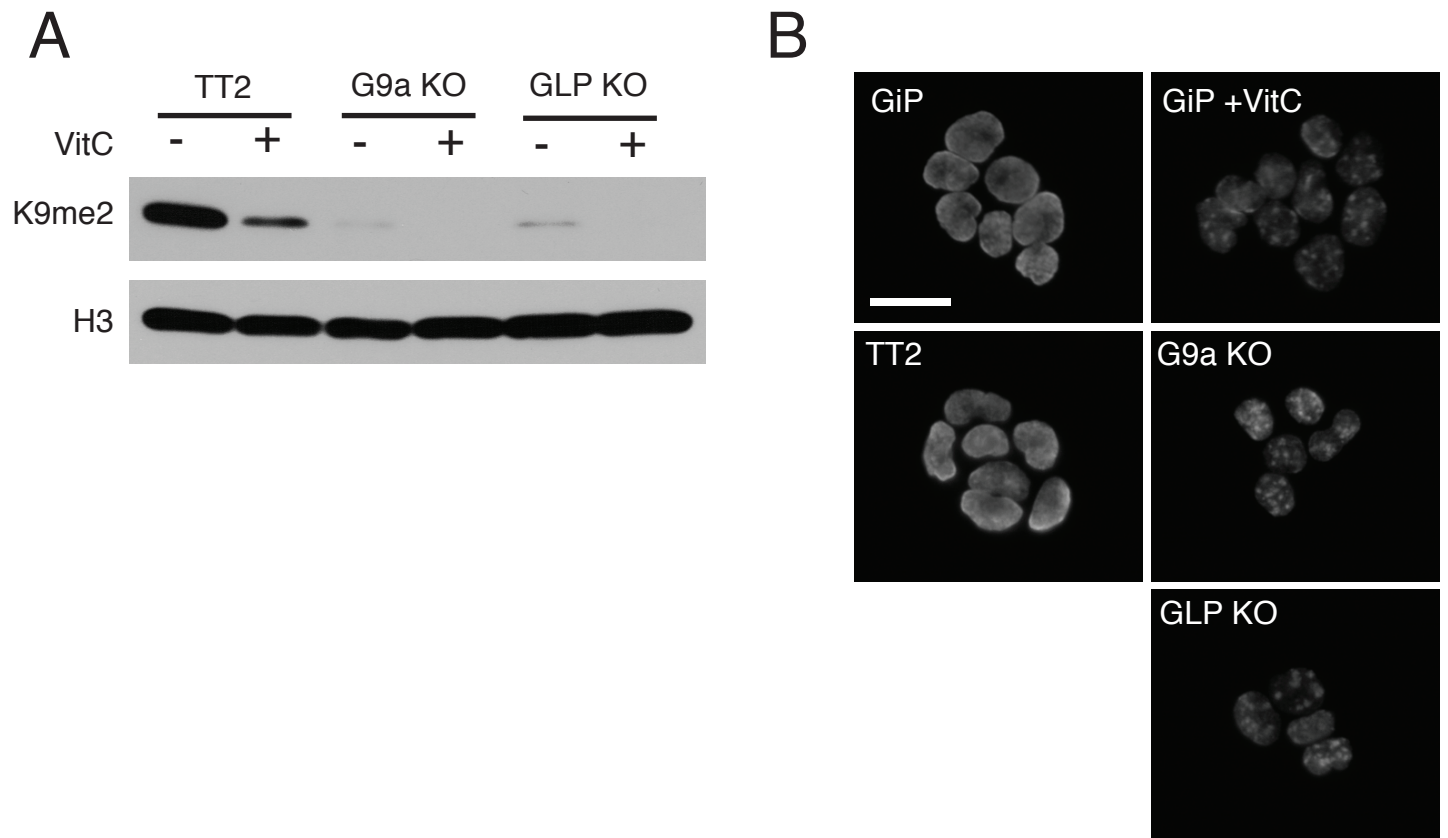

**Figure S2. Analysis of H3K9me2 in G9a and GLP knockout ES cells treated with vitamin C.**  
A) Western blot for H3K9me2 in wildtype parental TT2, G9a knockout, and GLP knockout ES cells +/- vitamin C. B) Immunofluorescence for H3K9me2 in GiP ES cells +/- vitamin C and untreated wildtype TT2, G9a knockout, and GLP knockout ES cells. GiP ES cells treated with vitamin C show a H3K9me2 staining pattern that is similar to G9a and GLP knockout ES cells. Scale bar represents 20 $\mu$ m.
