# Supplementary material for: Vitamin C induces specific demethylation of H3K9me2 in mouse embryonic stem cells via Kdm3a/b
Source: PubMed Central journal article supplement (PMC5506665; doi:10.1186/s13072-017-0143-3), 2017-07-12
Supplement: 13072_2017_143_MOESM4_ESM.pdf [file 13072_2017_143_MOESM4_ESM.pdf]

# Figure S4

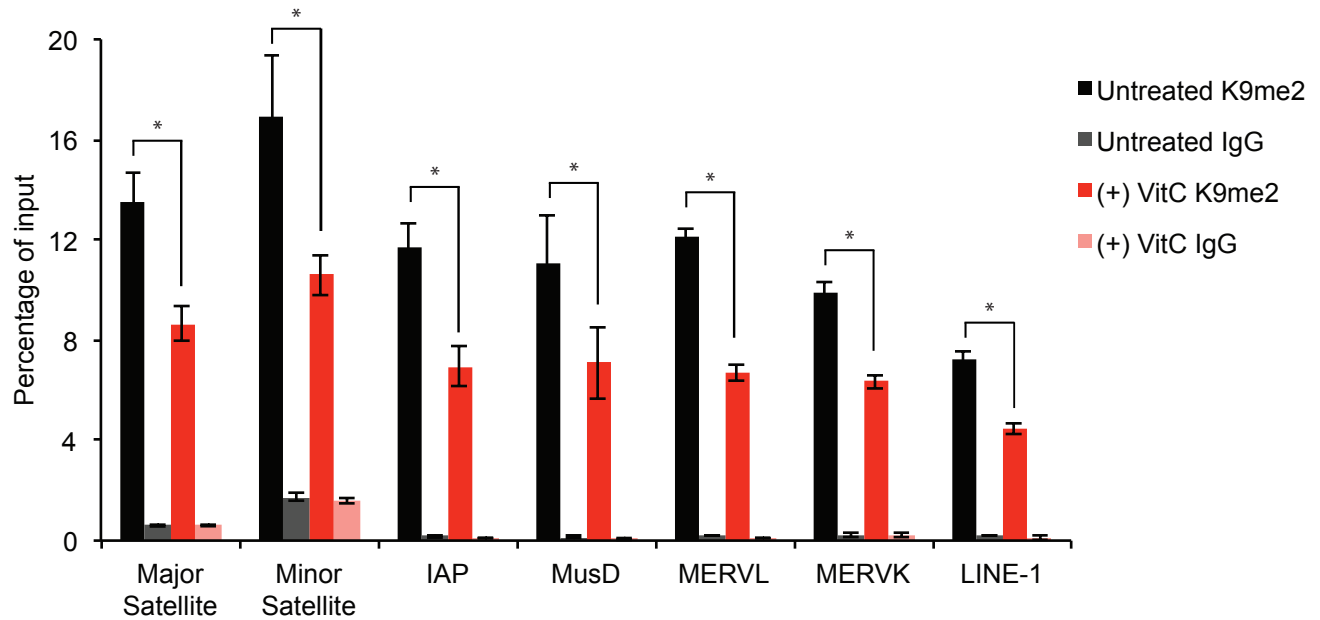

**Figure S4. Analysis of H3K9me2 at repetitive elements in ES cells treated with vitamin C.** ChIP-qPCR for H3K9me2 in ES cells +/- vitamin C at the repetitive element families indicated. ChIP for IgG was performed as a negative control. Data are means  $\pm$  SD. Asterisks represent  $P < 0.05$  by t-test.
