# Supplementary material for: Vitamin C induces specific demethylation of H3K9me2 in mouse embryonic stem cells via Kdm3a/b
Source: PubMed Central journal article supplement (PMC5506665; doi:10.1186/s13072-017-0143-3), 2017-07-12
Supplement: 13072_2017_143_MOESM5_ESM.pdf [file 13072_2017_143_MOESM5_ESM.pdf]

# Figure S5

## A

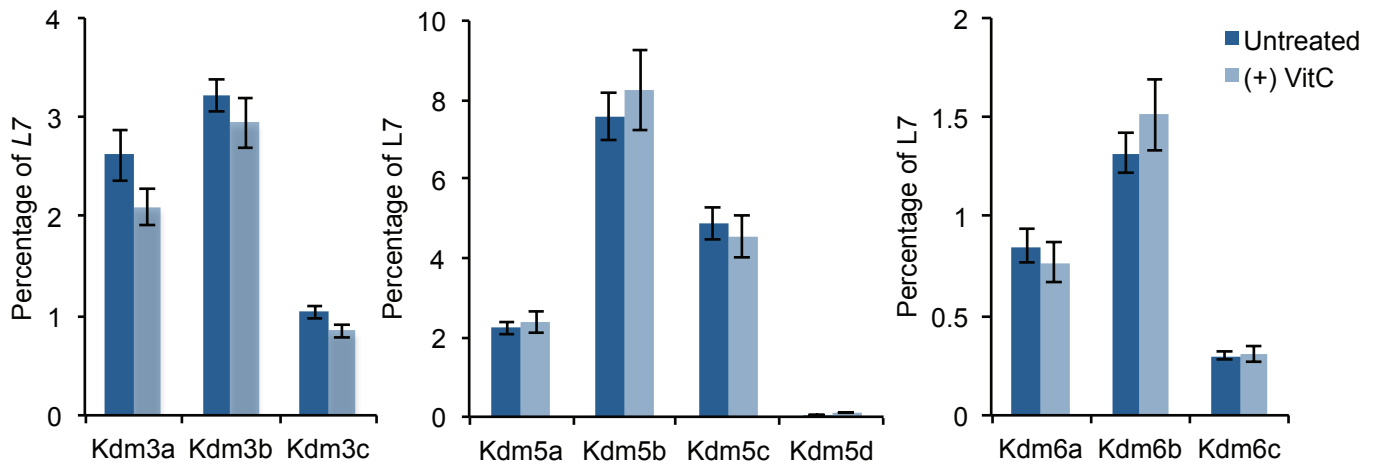

## B

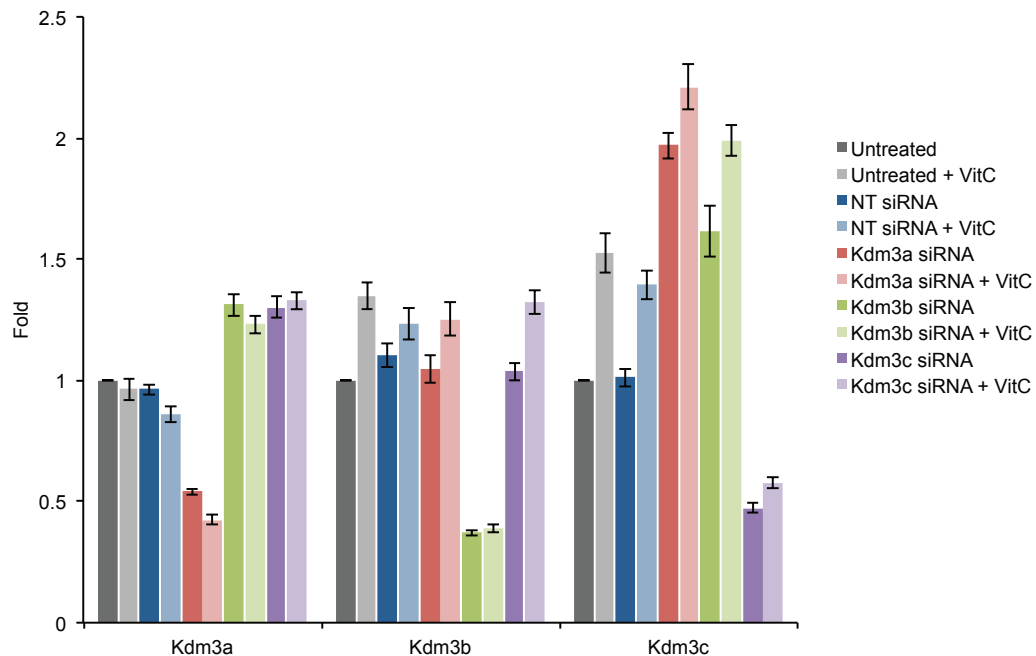

**Figure S5. Effect of vitamin C treatment and siRNA knockdown on the expression of Kdm enzymes.**

A) Expression of Kdm family enzymes as a percentage of housekeeping gene in ES cells +/- vitamin C. B) Gene expression levels of Kdm3a, Kdm3b, and Kdm3c following siRNA knockdown. Data is presented as fold change relative to the untreated control. A non-targeting (NT) siRNA was also used as a control. Each siRNA was applied in the presence or absence of vitamin C to show that vitamin C treatment does not affect knockdown efficiency.
