# Supplementary material for: Vitamin C induces specific demethylation of H3K9me2 in mouse embryonic stem cells via Kdm3a/b
Source: PubMed Central journal article supplement (PMC5506665; doi:10.1186/s13072-017-0143-3), 2017-07-12
Supplement: 13072_2017_143_MOESM6_ESM.pdf [file 13072_2017_143_MOESM6_ESM.pdf]

# Figure S6

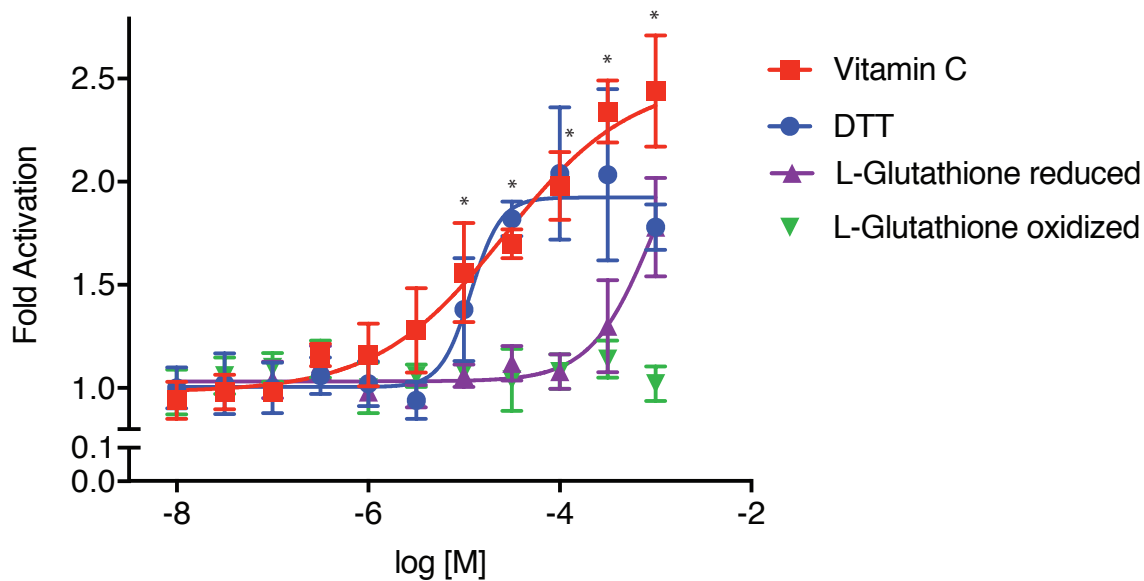

**Figure S6. Effect of  $\alpha$ -ketoglutarate on recombinant KDM3A activity with vitamin C, DTT and glutathione.**

In vitro activity of recombinant KDM3A towards demethylation of a synthetic H3K9me1 peptide, in the presence of vitamin C, DTT or Glutathione, at  $1\mu\text{M}$   $\alpha$ -KG (see Methods for details). At this lower concentration of  $\alpha$ -KG, both vitamin C and DTT can enhance activity of KDM3A, but the effect of DTT saturates, whereas vitamin C does not. Data are means  $\pm$  SD. Asterisks are  $P < 0.05$  by t-test for vitamin C compared to the oxidized form of Glutathione.
