# Supplementary material for: Vitamin C induces specific demethylation of H3K9me2 in mouse embryonic stem cells via Kdm3a/b
Source: PubMed Central journal article supplement (PMC5506665; doi:10.1186/s13072-017-0143-3), 2017-07-12
Supplement: 13072_2017_143_MOESM7_ESM.pdf [file 13072_2017_143_MOESM7_ESM.pdf]

**Table S1**

| <b>qRT-PCR</b> | <b>Forward(5'to3')</b>   | <b>Reverse(5'to3')</b>   |
|----------------|--------------------------|--------------------------|
| <i>Asz1</i>    | GAGTGGGCTTCTCCCAGAAA     | GGTCATTTTCCCGCTCATT      |
| <i>Dazl</i>    | CAACTGTAACTACCACTGCAG    | CAAGAGACCACTGTCTGTATGC   |
| <i>Gtsf1</i>   | GACTCCCTGGACCCTGAAAA     | GCCAATTTGTTTGCAGATC      |
| <i>Kdm3a</i>   | GACCTGGGCCCAAGATGTA      | CCATGACATTGGCTGCATCAGA   |
| <i>Kdm3b</i>   | CGGTAGTGAGCGGAGATCCT     | CAGCCGTCAAACCTCCACAAA    |
| <i>Kdm3c</i>   | TTCTTGATCTGTGACCAGCA     | CTTATGCACACCCGGAAACCA    |
| <i>Kdm4a</i>   | TCCATCTATGGAGCAGACG      | GTCCAGGATGGTCTTCAGC      |
| <i>Kdm4b</i>   | CCATGGATGAATTCAGGGACTT   | CCACTCCTTGGGTGGAATGA     |
| <i>Kdm4c</i>   | GACCATACAAAGCCCCTCCA     | CAAAGTGGCTTATTGCCCTGT    |
| <i>Kdm4d</i>   | TGGATATGAAGAAGGCGCAAA    | AGACTGGGGTGCAGCAGAAT     |
| <i>Kdm5a</i>   | TTGAAGATCCCTGTGGTGGGA    | GCGGCTACCCACTTTAGACC     |
| <i>Kdm5b</i>   | CCACCATTGCTTGTGATGT      | TTGCAATCTGGTCCAGGAAA     |
| <i>Kdm5c</i>   | ACCCACCTGGCAAAAACATT     | TCATTATCAAATGGCGTGTG     |
| <i>Kdm5d</i>   | CAGCCATCAAATTCAGTTGC     | GGCTGCCCATATATCTGTA      |
| <i>Kdm6a</i>   | TGAGCAACTTTTGAGACAGAA    | TCCTTGGTGGCCTTATCTCC     |
| <i>Kdm6b</i>   | GCCGGTCTGCTACAGTTCT      | CTCGCCTCCACCAGAGTCTT     |
| <i>L7</i>      | AGCGGATTGCCTTGACAGAT     | AACTTGAAGGGCCACAGGAA     |
| <i>Magea2</i>  | GAGGTCTCATGCTGTGCCA      | TGGCGCCTAGTTCAAGTCCA     |
| <i>Magea5</i>  | GGTATCAAAGAGCTGAAACCCTGG | CGGATGTCTCATGGTCTCTCT    |
| <i>Nanog</i>   | AGGCTTTGGAGACAGTGAGGTGC  | TACCCTCAAACCTCCTGGTCCTTC |
| <i>Pdha2</i>   | AAGGGCAGGTATTCGAAGCA     | CTCGTTGGAGGTTCCCATTC     |
| <i>Rpl39l</i>  | TTTAAACTCGCCGGGAAGAG     | TGTGGAATGGGACGATTTTG     |
| <i>Ubb</i>     | GAGAGGCTTTGTCCGGTTCG     | TCTTACGAAGATCTGCATTTTGAC |
| <i>Wfdc15a</i> | TGTGTGGAACCCTGGACAAC     | GCCAATGCCGTGCTTATTTT     |

| <b>ChIP&amp;DIP-qPCR</b> | <b>Forward(5'to3')</b>    | <b>Reverse(5'to3')</b>    |
|--------------------------|---------------------------|---------------------------|
| <i>Asz1</i>              | CCTCACTATCGCTGCTCTCG      | CGCTCGCTCAAGCTCTGATA      |
| <i>Dazl</i>              | TACAAAATGCCGCGAGAAATAG    | CCGGACTCAACCTTCTCAATG     |
| <i>Gapdh</i>             | CTCCGCGATTTTACCTGGC       | AATACGGACTGCAGCCCTCC      |
| <i>Gtsf1</i>             | TTCTGTGACTGTGGCTTGC       | GGAGGGTGAAGCAAAGAAAA      |
| <i>IAP</i>               | GCTCCTGAAGATGTAAGCAATAAAG | CTTCCTTGCGCCAGTCCCGAG     |
| <i>MageA2</i>            | GGAGCTAGGCAGGCTAAAGGT     | TCTCCATGCTGTGCCAGTTG      |
| <i>MageA5</i>            | TGGCTTTCTTGCTACAAGATTCT   | AGTGGGAGGAGATTTTTGGGGA    |
| <i>Major satellite</i>   | GACGACTTGAAAAATGACGAAATC  | CATATTCCAGGTCCTTCAAGTGTGC |
| <i>MERVK</i>             | TTCGCCTCTGCAATCAAGCTCTC   | TCGCTCRTGCCTGAAGATGTTTTC  |
| <i>MERVL</i>             | CTTCCATTCACAGCTGCGACTG    | CTAGAACCACTCCTGGTACCAAC   |
| <i>MusD</i>              | CCCTTCCTTCATAACTGGTGTGCGA | TAGCATCTCTGCCATTCTCAGG    |
| <i>Pdha2</i>             | TAAGATGGCTGCCGAGCTCC      | GTGGCTTCCAGCTTGTGAC       |
| <i>Rpl39l</i>            | TGCAGCTGACACTGGACACA      | TCACTGTTGTTTGGGGGCT       |
| <i>Wfdc15a</i>           | GGGAGGACGTTTGAATCTGC      | GCACTTCCGTTTTCTGACC       |
